# Supplementary material for: Gene expression-based risk score in diffuse large B-cell lymphoma
Source: PubMed Central journal article supplement (PMC3681505; doi:10.18632/oncotarget.807), 2012-12-31
Supplement: oncotarget-03-1700-s001.pdf [file oncotarget-03-1700-s001.pdf]

## Gene expression-based risk score in diffuse large B-cell lymphoma - Bret et al

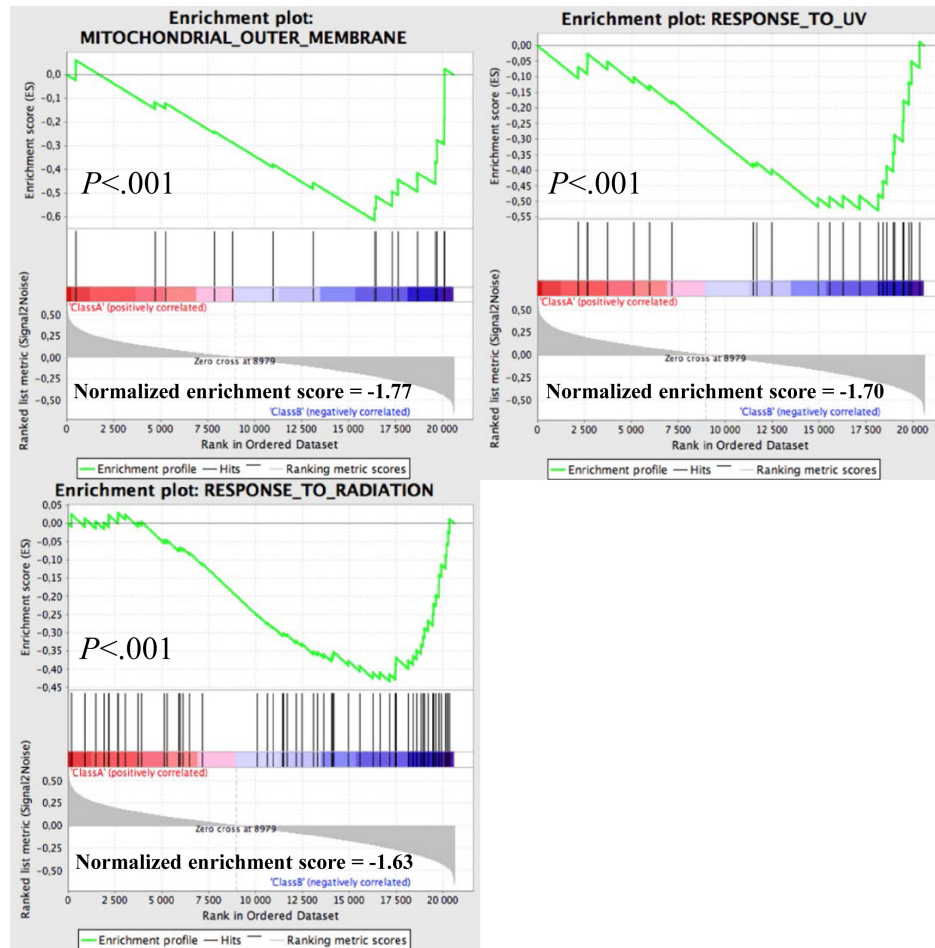

**Supplementary Figure 1: Top gene sets significantly associated with high GERS group.** GSEA enrichment plots with the absolute enrichment p value and the normalized enrichment score of the gene set.

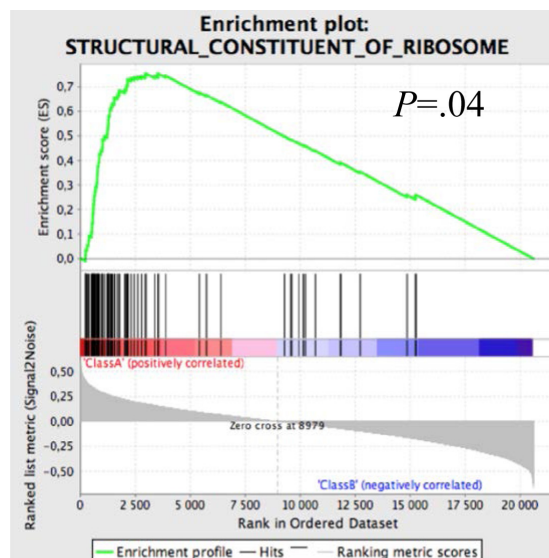

**Supplementary Figure 2: Top gene set significantly associated with low GERS group.** GSEA enrichment plot with the absolute enrichment p value and the normalized enrichment score of the gene set.
